# Supplementary material for: High-performance p–i–n perovskite photodetectors and image sensors with long-term operational stability enabled by a corrosion-resistant titanium nitride back electrode
Source: Royal Society of Chemistry journal article supplement (doi:10.1039/d3nr00410d), 2023-01-01
Supplement: d3nr00410d2.pdf [file d3nr00410d2.pdf]

Supporting Information for

**High-Performance p-i-n Perovskite Photodetectors and  
Image Sensors with Long-Term Operational Stability  
Enabled by a Corrosion-Resistant Titanium Nitride Back  
Electrode**

*Tian Sun<sup>1</sup>, Tong Chen<sup>1</sup>, Jiahao Chen<sup>1</sup>, Qiang Lou<sup>1</sup>, Zihao Liang<sup>1</sup>, Guijun Li<sup>2\*</sup>,*

*Xiaoyun Lin<sup>1</sup>, Guoshen Yang<sup>1</sup>, Hang Zhou<sup>1\*</sup>*

1. School of Electronic and Computer Engineering, Peking University Shenzhen

Graduate School, Shenzhen 518055, China

2. Key Laboratory of Optoelectronic Devices and Systems of Ministry of Education

and Guangdong Province, College of Physics and Optoelectronic Engineering,

Shenzhen University

\*Corresponding author: gliad@connect.ust.hk; zhouh81@pkusz.edu.cn.

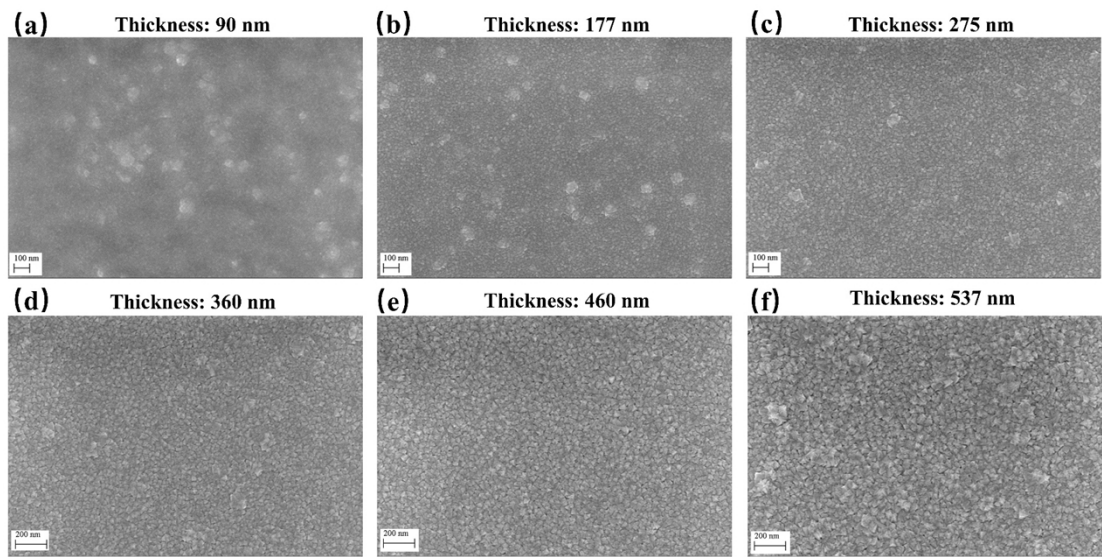

**Figure S1.** The top-view of TiN films sputtered on  $C_{60}$  with different thicknesses (a) 90 nm (b) 177 nm (c) 275 nm (d) 360 nm (e) 460 nm (f) 537 nm

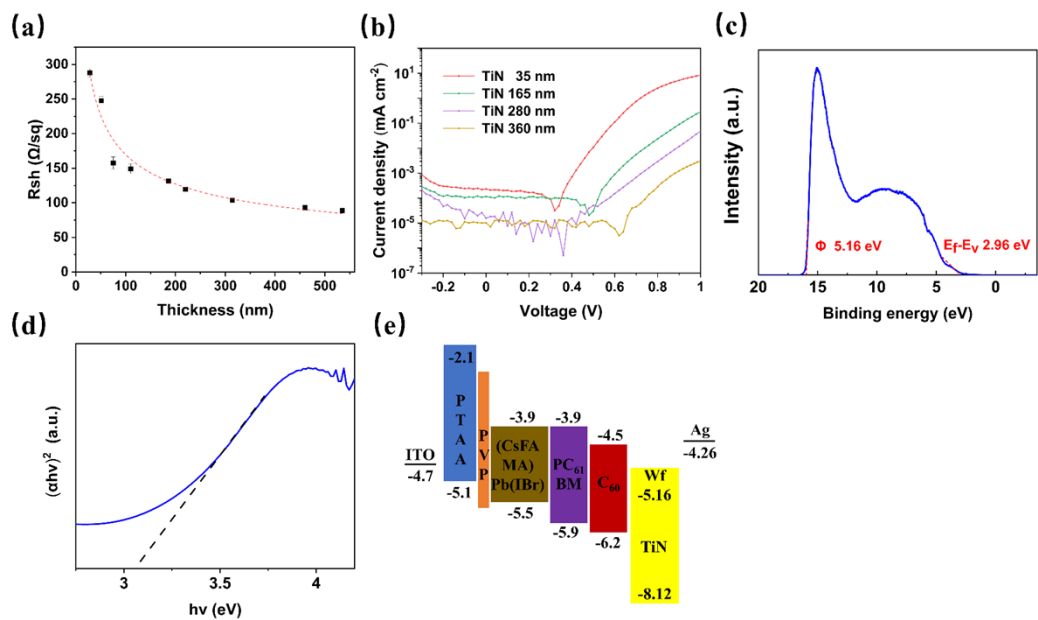

**Figure S2.** (a)  $R_{sh}$  as a Function of Thickness of TiN Films (b) The dark current of TiN-based perovskite photodiode with different TiN thickness (c) The UPS spectrum

of TiN film using He I excitation (21.2 eV) (d) The Plot of  $(\alpha h\nu)^2$  against photon energy for the TiN thin film, which indicates a direct bandgap of  $\sim 3.06$  eV (e) Energy level of the TiN-based photodetector.

**Table S1** Simulation parameters of TiN-based perovskite photodetector for energy band in this study.

|                                    | PTAA              | Perovskite          | PCBM                 | C <sub>60</sub>     | TiN    |
|------------------------------------|-------------------|---------------------|----------------------|---------------------|--------|
| E <sub>g</sub> (eV)                | 3 <sup>1</sup>    | 1.6 <sup>2</sup>    | 2.0 <sup>3</sup>     | 1.7 <sup>4</sup>    | 3.06   |
| $\chi$ (eV)                        | 2.1 <sup>1</sup>  | 3.9 <sup>2</sup>    | 3.9 <sup>3</sup>     | 4.5 <sup>4</sup>    | 5.06   |
| Thickness (nm)                     | 20                | 600                 | 40                   | 20                  | 360    |
| N <sub>A</sub> (cm <sup>-3</sup> ) | 1e18              | 0                   | 0                    | 0                   | 0      |
| N <sub>D</sub> (cm <sup>-3</sup> ) | 0                 | 0                   | 2.93e17 <sup>5</sup> | 2e18 <sup>4</sup>   | 2.5e20 |
| N <sub>C</sub> (cm <sup>-3</sup> ) | 2e18 <sup>6</sup> | 2.5e20 <sup>7</sup> | 2.5e21 <sup>8</sup>  | 2.2e18 <sup>4</sup> | 2.5e21 |
| N <sub>V</sub> (cm <sup>-3</sup> ) | 2e19 <sup>6</sup> | 2.5e20 <sup>7</sup> | 2.5e21 <sup>8</sup>  | 1.8e19 <sup>4</sup> | 2.5e21 |

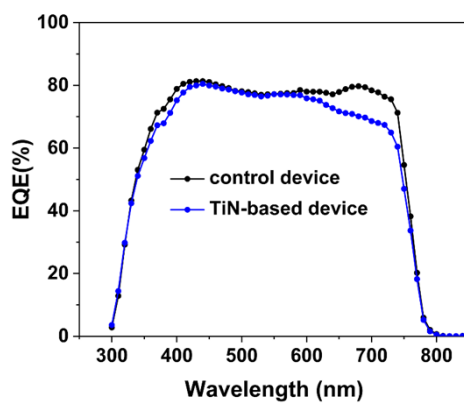

**Figure S3** EQE of perovskite photodiodes with and without TiN.

**Table S2** The rise time and fall time of TiN-based photodetector measured at different frequencies

| Frequency (hz)               | 250                         | 500  | 1000 | 2000 | 3000 | 4000 |      |
|------------------------------|-----------------------------|------|------|------|------|------|------|
| Control device               | Rise time ( $\mu\text{s}$ ) | 98.4 | 101  | 103  | 102  | 88.9 | 77.4 |
|                              | Fall time ( $\mu\text{s}$ ) | 102  | 101  | 94   | 103  | 92.6 | 91.5 |
| Control device<br>(-0.2 V)   | Rise time ( $\mu\text{s}$ ) | 98.3 | 100  | 89.5 | 97.7 | 93.2 | 76.6 |
|                              | Fall time ( $\mu\text{s}$ ) | 105  | 103  | 103  | 102  | 97.2 | 79.1 |
| TiN-based device             | Rise time ( $\mu\text{s}$ ) | 108  | 127  | 112  | 117  | 94.4 | 85.2 |
|                              | Fall time ( $\mu\text{s}$ ) | 102  | 146  | 98.1 | 107  | 104  | 78.2 |
| TiN-based device<br>(-0.2 V) | Rise time ( $\mu\text{s}$ ) | 112  | 106  | 104  | 108  | 96.5 | 86.5 |
|                              | Fall time ( $\mu\text{s}$ ) | 116  | 116  | 94.3 | 110  | 98   | 78.3 |

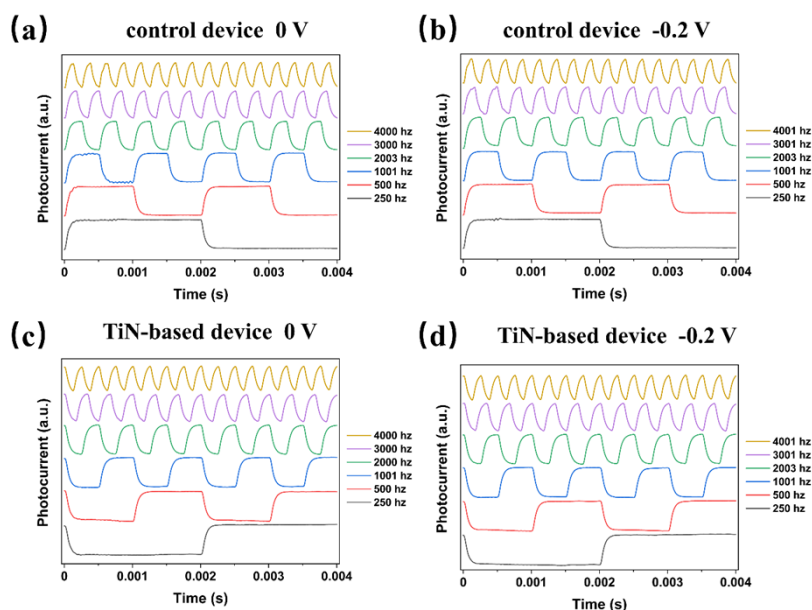

**Figure S4** (a) The response of control device under 520 nm light (intensity: 1.54 mW cm<sup>-2</sup>) at different frequencies (a) under 0 bias (b) under -0.2 V bias The response of

TiN-based device under 520 nm light (intensity: 1.54 mW cm<sup>-2</sup>) at different frequencies (c) under 0 bias (d) under -0.2 V bias

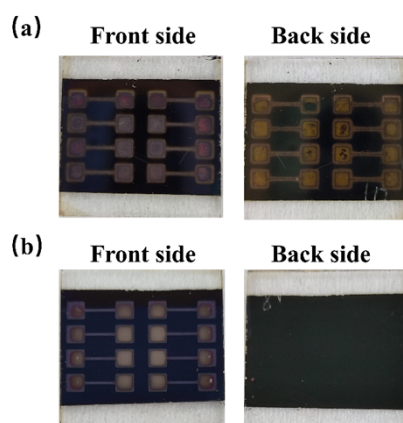

**Figure S5** Appearance of electrodes aged for 507 hours at 85 °C (a) control group: photodetector without TiN (b) TiN-based photodetector

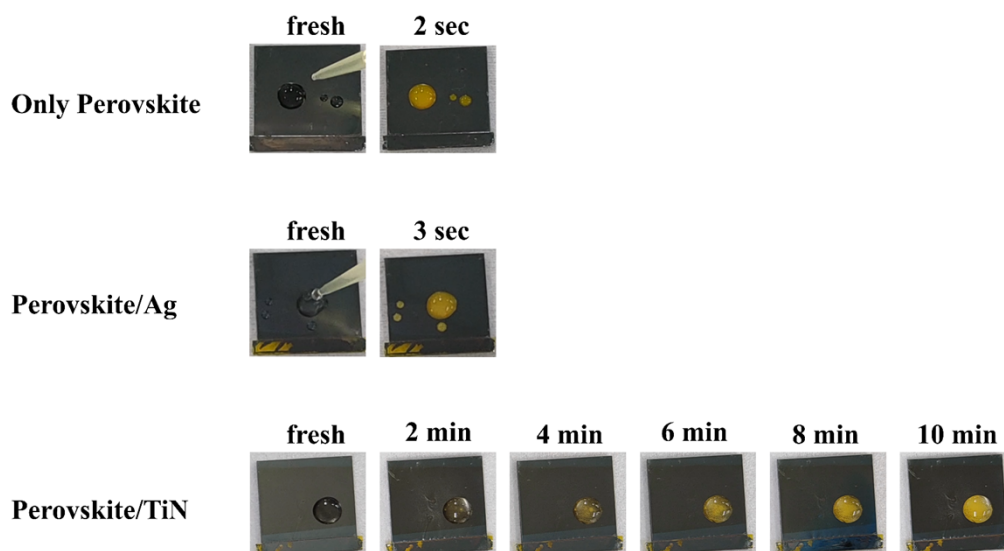

**Figure S6** Dripping water of different films. Only perovskite, perovskite/Ag (10 nm), and perovskite/TiN (10 nm) films, respectively.

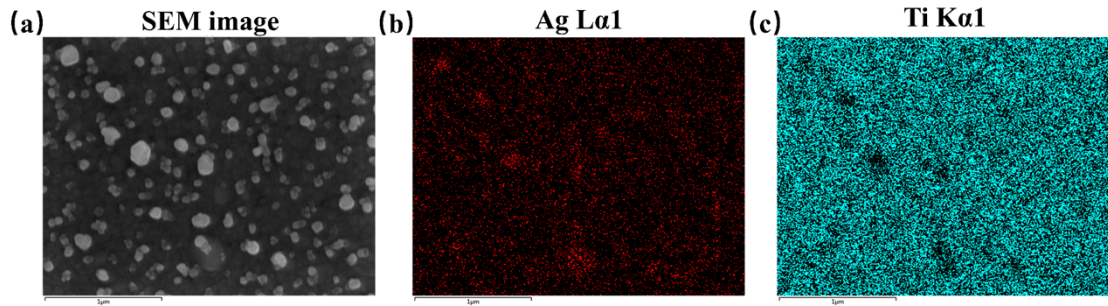

**Figure S7** (a) Top-view SEM of TiN-based device (b) Ag EDS map (c) Ti EDS map

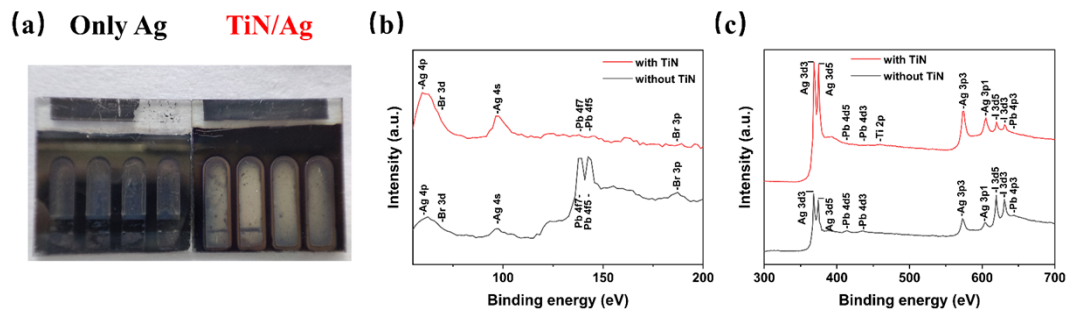

**Figure S8** (a) Electrode appearance of aged device. (b-c) The XPS spectra of electrodes for control device and TiN-based device.

**Table S3** The atomic content of elements estimated by XPS

| Atomic concentration (%) | Without TiN | With TiN |
|--------------------------|-------------|----------|
| Ag 3d (%)                | 56.8        | 87.0     |
| I 3d (%)                 | 38.3        | 9.8      |
| Pb 4f (%)                | 4.9         | 0.2      |
| Br 3d (%)                | <0.1        | <0.1     |
| Ti 2p (%)                | —           | 3.0      |
| Total (%)                | 100         | 100      |

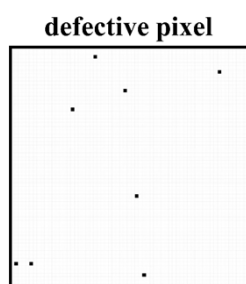

**Figure S9** aged array defective spot detection (185 days with glass encapsulation)

**(a) fresh-made array detection**

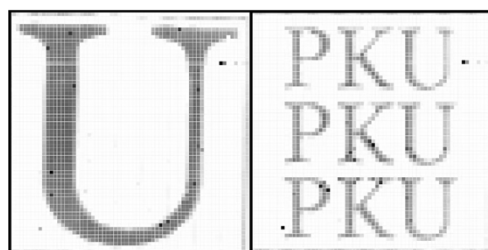

**(b) aged array detection (185 days with only glass encapsulated)**

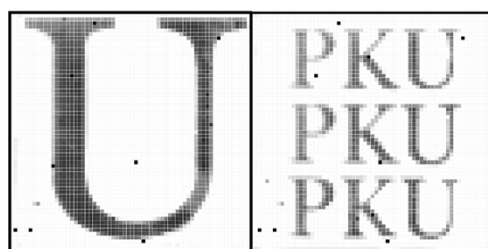

**Figure S10** (a) The imaging performance for fresh-made device (b) The imaging performance for aged device. (185 days with glass encapsulation)

**REFERENCES**

1. J. Xu, J. Dai, H. Dong, P. Li, J. Chen, X. Zhu, Z. Wang, B. Jiao, X. Hou, J. Li and Z. Wu, *Organic Electronics*, 2022, **100**, 106378.
2. D. Luo, T. Zou, W. Yang, B. Xiang, X. Yang, Y. Wang, R. Su, L. Zhao, R. Zhu, H. Zhou, T. P. Russell, H. Yu and Z.-H. Lu, *Advanced Functional Materials*, 2020, **30**, 2001692.
3. O. Malinkiewicz, A. Yella, Y. H. Lee, G. M. Espallargas, M. Graetzel, M. K. Nazeeruddin and H. J. Bolink, *Nature Photonics*, 2014, **8**, 128-132.
4. Z. Qirong, Z. Bao, H. Yongmao, L. Liang, D. Zhuoqi, X. Zaixin and Y. Xiaobo, *Materials Research Express*, 2022, **9**, 036401.
5. S. K. Saha, A. Guchhait and A. J. Pal, *Physical Chemistry Chemical Physics*, 2012, **14**, 8090-8096.
6. D. K. Jarwal, A. K. Mishra, A. Kumar, S. Ratan, A. P. Singh, C. Kumar, B. Mukherjee and S. Jit, *Superlattices and Microstructures*, 2020, **140**, 106463.
7. W. A. Laban and L. Etgar, *Energy & Environmental Science*, 2013, **6**, 3249-3253.
8. Y. Wang, Z. Xia, J. Liang, X. Wang, Y. Liu, C. Liu, S. Zhang and H. Zhou, *Semiconductor Science and Technology*, 2015, **30**, 054004.
